# Supplementary material for: Antibacterial Potential of Essential Oils and Silver Nanoparticles against Multidrug-Resistant Staphylococcus pseudintermedius Isolates
Source: MDPI journal article supplement (doi:10.3390/pathogens13020156), 2024-02-09
Supplement: s1 [file s1]

Supplementary Table S1. Minimum inhibitory concentration (MIC) and minimum bactericidal concentration (MBC) of the tested EOs against bacterial reference strains

| MIC | ECO   | SAU    | KPN    | MIC    | ECA    | PRE    | PVU    | SAG    | SAL   |
|-----|-------|--------|--------|--------|--------|--------|--------|--------|-------|
| AB  | 1:64  | 1:512  | 1:512  | 1:1024 | 1:128  | 1:2048 | 1:2048 | 1:2048 | 1:64  |
| RO  | 1:128 | 1:512  | 1:256  | 1:512  | 1:256  | 1:2048 | 1:2048 | 1:1024 | 1:256 |
| GI  | 1:64  | 1:2048 | 1:1024 | 1:256  | 1:128  | 1:256  | >1:4   | 1:1024 | 1:64  |
| AR  | 1:32  | 1:8    | 1:8    | 1:32   | 1:1024 | 1:256  | 1:2048 | 1:2048 | 1:128 |
| NPs | 1:128 | 1:512  | 1:512  | 1:512  | 1:512  | 1:256  | 1:256  | 1:256  | 1:128 |
| MBC | ECO   | SAU    | KPN    | MIC    | ECA    | PRE    | PVU    | SAG    | SAL   |
| AB  | 1:8   | 1:128  | 1:128  | 1:128  | 1:4    | 1:64   | 1:1024 | 1:1024 | 1:4   |
| RO  | 1:64  | 1:512  | 1:64   | 1:64   | 1:8    | 1:2048 | 1:2048 | 1:512  | 1:128 |
| GI  | 1:8   | 1:8    | 1:256  | 1:64   | 1:64   | 1:64   | >1:4   | 1:128  | 1:16  |
| AR  | 1:4   | 1:4    | 1:4    | 1:4    | 1:4    | 1:32   | 1:1024 | 1:1024 | 1:16  |
| NPs | 1:32  | 1:128  | 1:128  | 1:128  | 1:128  | 1:256  | 1:128  | 1:256  | 1:32  |

Abbreviations: ECO= *Escherichia coli* ATCC 25922, SAU= *S. aureus* ATCC 6358, KPN= *Klebsiella pneumoniae* subsp. *ozaenae* ATCC 11296, MIC= *Micrococcus yunnanensis* ATCC 7468, ECA= *Enterococcus casseliflavus* ATCC 12755, PRO= *Providencia rettgeri* ATCC 9250, PVU= *Proteus vulgaris* ATCC 7829, SAG= *Streptococcus agalactiae* ATCC 13813, SAL= *Salmonella enterica* subsp. *enterica* serovar Enteritidis ATCC 25928
